# Supplementary material for: 3D Printed Mini-Floating-Polypill for Parkinson’s Disease: Combination of Levodopa, Benserazide, and Pramipexole in Various Dosing for Personalized Therapy
Source: MDPI journal article supplement (doi:10.3390/pharmaceutics14050931), 2022-04-25
Supplement: s1 [file s1]

# 3D Printed Mini-Floating-Polypill for Parkinson's Disease: Combination of Levodopa, Benserazide, and Pramipexole in Various Dosing for Personalized Therapy

Hellen Windolf, Rebecca Chamberlain, Jörg Breitzkreutz, Julian Quodbach

## Supplemental Material

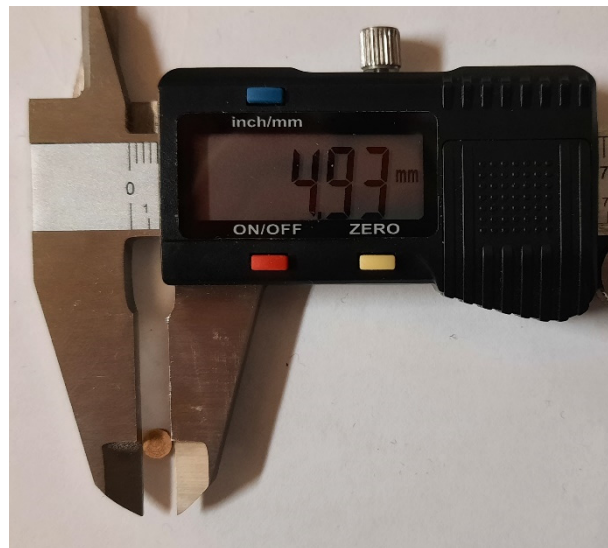

**Figure S1:** Dimensions of MiniTab: 4.93 mm in diameter, deviation of 0.07 mm to the CAD model.

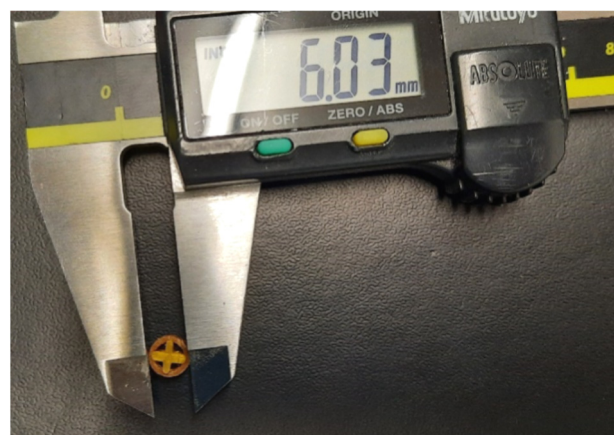

**Figure S2:** Dimensions of MiniHCwC: 6.03 mm in diameter, deviation of 0.03 mm to the CAD model.

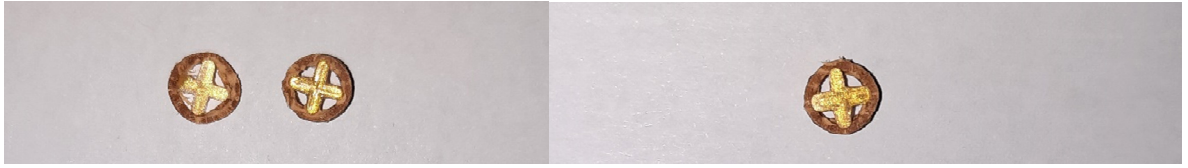

**Figure S3:** *Images of MiniHCwC1 (left) and MiniHCwC2 (right).*
